# Supplementary material
Source: publisher figshare collection journal article supplement (https://gsajournals.figshare.com/ndownloader/files/27627809)
Supplement: Supplementary file 1 [file 27627809]

## Sheet: Sheet1
Table S5. Genomic coordinates of RCEs
RCE	Location S. pombe ASM294v2	Orientation
1Ldg	I:3763360-3764146	Reverse
1Rdg	I:3778127-3778914	Forward
2Ldg	II:1604141-1604929	Forward
3Ldg	III:1072993-1073788	Forward
3Rdg	III:1136923-1137718	Reverse
1Rdh	I:3787476-3788560	Reverse
2LRdh	II:1610511-1611586	Forward
	II:1636296-1637371	Reverse
3LRdh	III:1087986-1089060	Forward
	III:1109885-1110959	Reverse
3Ldh	III:1079353-1080429	Forward
3Rdh	III:1116643-1117719	Reverse
	III:1123403-1124479	Reverse
	III:1130163-1131239	Reverse
